# Supplementary material for: “Fishnet-like” ion-selective nanochannels in advanced membranes for flow batteries
Source: Royal Society of Chemistry journal article supplement (doi:10.1039/c9ta06742f), 2019-01-01
Supplement: c9ta06742f1.pdf [file c9ta06742f1.pdf]

## Supporting Information

### **“Fishnet-like” Ion-selective Nanochannels in Advanced Membranes for Flow Batteries**

Lei Hu,<sup>a,b</sup> Li Gao,<sup>a,b</sup> Changkun Zhang,<sup>c</sup> Xiaoming Yan,<sup>\*a,b</sup> Xiaobin Jiang,<sup>b</sup> Wenji Zheng,<sup>a</sup> Xuehua Ruan,<sup>a</sup> Xuemei Wu,<sup>b</sup> Guihua Yu<sup>c</sup> and Gaohong He<sup>\*a,b</sup>

<sup>a</sup>State Key Laboratory of Fine Chemicals, School of Petroleum and Chemical Engineering, Dalian University of Technology, 2 Dagong Road, Panjin, LN 124221, China. Email: yanxiaoming@dlut.edu.cn; hgaohong@dlut.edu.cn

<sup>b</sup>State Key Laboratory of Fine Chemicals, R&D Center of Membrane Science and Technology, School of Chemical Engineering, Dalian University of Technology, 2 Linggong Road, Dalian, LN 116024, China.

<sup>c</sup>Materials Science and Engineering Program and Department of Mechanical Engineering, The University of Texas at Austin, TX 78712, USA.

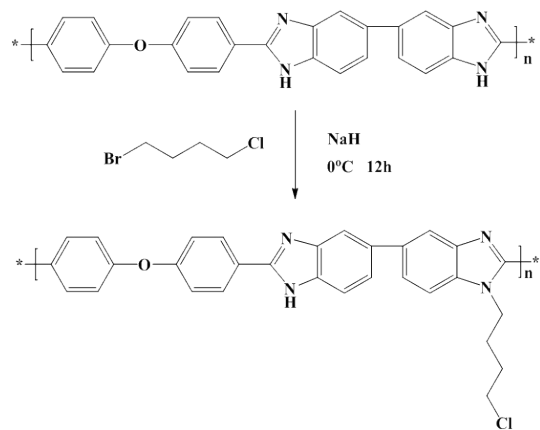

**Figure S1.** Synthesis of CPBI.

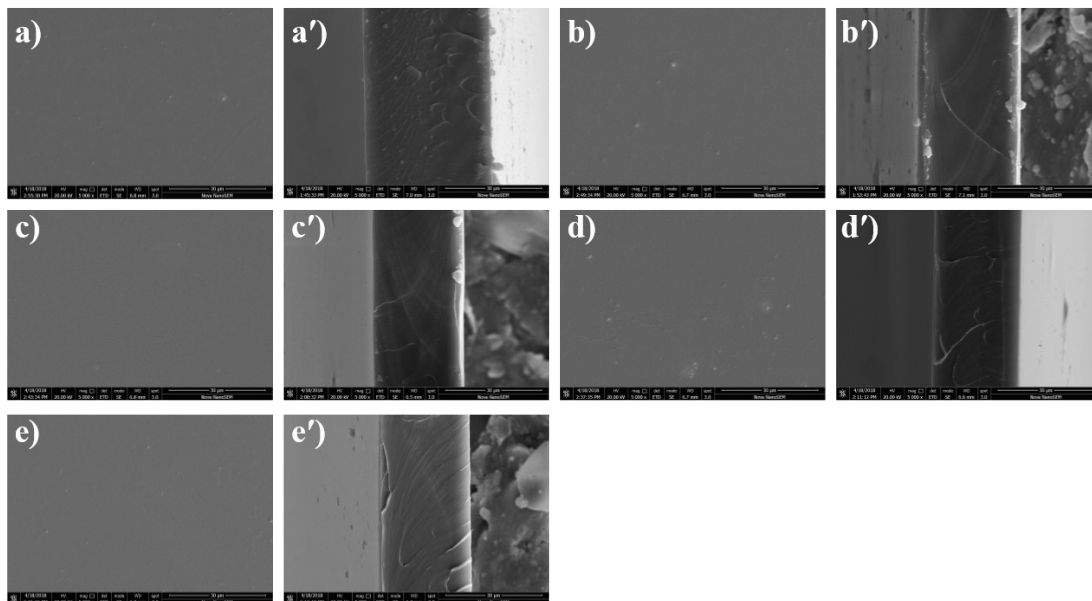

**Figure S2.** SEM images of membranes: PBI (a: surface, a': cross section); CPBI (b: surface, b': cross section); CPBI-PEI-10 (c: surface, c': cross section); CPBI-PEI-15 (d: surface, d': cross section); CPBI-PEI-20 (e: surface, e': cross section).

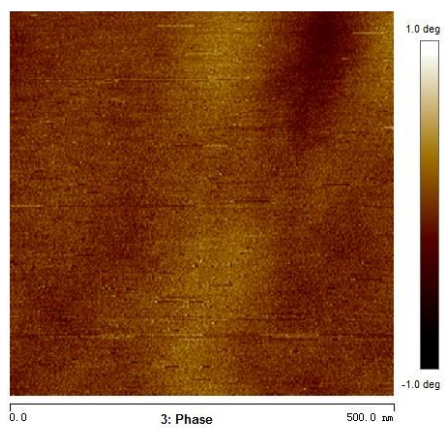

**Figure S3.** AFM phase image of PBI membrane.

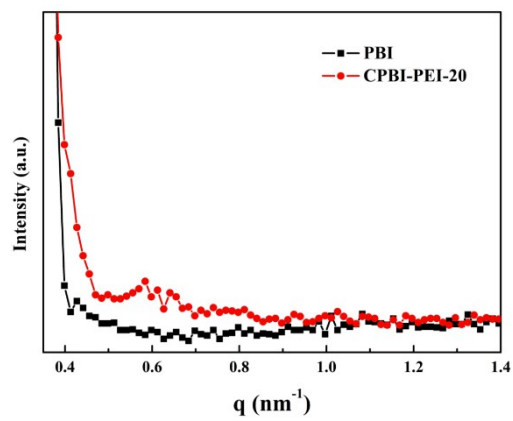

**Figure S4.** SAXS of PBI and CPBI-PEI-20 membrane.

**Table S1.** Proton conductivity, VO<sup>2+</sup> permeability and ion selectivity of the prepared membranes.

| Membrane    | Proton conductivity <sup>a</sup> | VO <sup>2+</sup> permeability                     | Ion selectivity                        |
|-------------|----------------------------------|---------------------------------------------------|----------------------------------------|
|             | mS cm <sup>-1</sup>              | 10 <sup>-10</sup> cm <sup>2</sup> s <sup>-1</sup> | 10 <sup>10</sup> mS s cm <sup>-3</sup> |
| PBI         | 35.2                             | No detected                                       | -                                      |
| CPBI        | 39.7                             | No detected                                       | -                                      |
| CPBI-PEI-10 | 63.1                             | 0.5                                               | 118.1                                  |
| CPBI-PEI-15 | 78.0                             | 2.7                                               | 28.8                                   |
| CPBI-PEI-20 | 115.9                            | 9.2                                               | 12.6                                   |
| Nafion 212  | 182.7                            | 552.6                                             | 0.3                                    |

<sup>a</sup>The proton conductivity is calculated from area resistances of prepared membranes as follow: proton conductivity = L/Area resistance, where L is thickness of membrane.

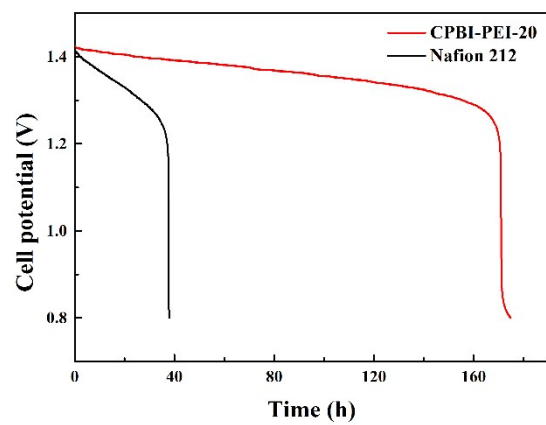

**Figure S5.** The self-discharge curves using CPBI-PEI-20 and Nafion 212 membranes.

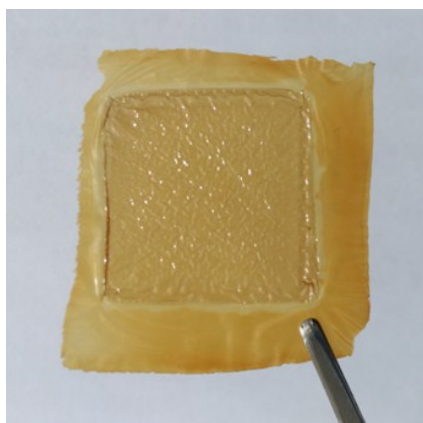

**Figure S6.** Digital photograph of CPBI-PEI-20 membrane after 2000 charge-discharge cycles at 120 mA  $\text{cm}^{-2}$ .



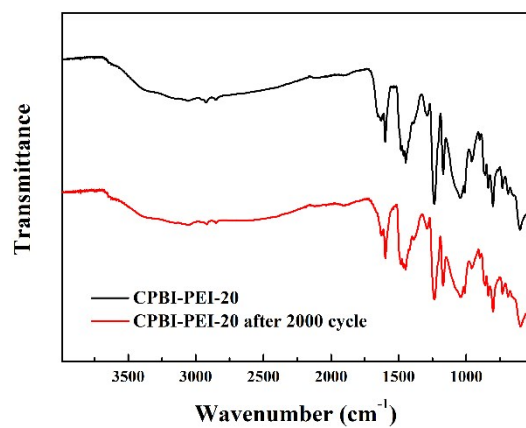

**Figure S7.** FTIR spectra of CPBI-PEI-20 membranes before and after 2000 charge-discharge cycles at 120 mA cm<sup>-2</sup>.
